# Supplementary material for: The “Pfizer Boob Job”: A Case of Unexplained Gigantomastia
Source: PubMed Central journal article supplement — Plast Reconstr Surg Glob Open. 2024 Dec 20;12(12):e6399. doi: 10.1097/GOX.0000000000006399 (PMC11661758; doi:10.1097/gox.0000000000006399), 2024-12-20
Supplement: gox-12-e6399-s001.pdf [file gox-12-e6399-s001.pdf]

| Authors                  | Age of presentation | Presentation                                                                                                                                                       | Disease Progression                                                                                                                                                                                                                                                       | Treatment                                                                                                                                                                                                             | Operative complications | Outcome                                                                                       |
|--------------------------|---------------------|--------------------------------------------------------------------------------------------------------------------------------------------------------------------|---------------------------------------------------------------------------------------------------------------------------------------------------------------------------------------------------------------------------------------------------------------------------|-----------------------------------------------------------------------------------------------------------------------------------------------------------------------------------------------------------------------|-------------------------|-----------------------------------------------------------------------------------------------|
| Kim et al. 2018          | 33                  | <ul style="list-style-type: none"> <li>Excessive breast enlargement 2 years after pregnancy (rapid growth?).</li> <li>No hormonal profile</li> </ul>               | <ul style="list-style-type: none"> <li>Continuous enlargement of both breasts without palpable discrete mass(es).</li> <li>Recurrent gigantomastia after 4 years.</li> </ul>                                                                                              | <ul style="list-style-type: none"> <li>Reduction mammoplasty</li> <li>Bilateral mastectomies</li> </ul>                                                                                                               |                         | <ul style="list-style-type: none"> <li>No recurrence after bilateral mastectomies.</li> </ul> |
| Singh et al., 2007       | 12                  | <ul style="list-style-type: none"> <li>Asymmetrical bilateral breast enlargement for 4 months following start of menarche.</li> <li>No hormonal profile</li> </ul> | <ul style="list-style-type: none"> <li>More prominent left breast enlargement</li> <li>Continuous enlargement of the right breast</li> <li>Re-enlargement of both breasts after surgery</li> <li>Second re-enlargement of both breasts after surgery</li> </ul>           | <ul style="list-style-type: none"> <li>Left breast excision.</li> <li>Right subcutaneous mastectomy (85% removal)</li> <li>Left breast reduction to correct the asymmetry.</li> <li>Bilateral mastectomies</li> </ul> |                         | <ul style="list-style-type: none"> <li>No recurrence after bilateral mastectomies.</li> </ul> |
| Xu et al., 2020          | 44                  | <ul style="list-style-type: none"> <li>Enlargement of both breasts following pregnancy</li> <li>No hormonal profile</li> </ul>                                     | <ul style="list-style-type: none"> <li>Rapid enlargement of both breasts and right axillary breast tissue following pregnancy</li> <li>Rapidly re-enlarged breasts within 8 months after the initial surgery, with more pronounced left axillary breast tissue</li> </ul> | <ul style="list-style-type: none"> <li>Reduction mammoplasty followed by right axillary breast excision.</li> <li>Bilateral mastectomies and left axillary breast tissue resection</li> </ul>                         |                         | <ul style="list-style-type: none"> <li>No recurrence after bilateral mastectomies.</li> </ul> |
| Vasconcelos et al., 2015 | 45                  | <ul style="list-style-type: none"> <li>Palpable right breast mass</li> </ul>                                                                                       | <ul style="list-style-type: none"> <li>Right breast mass, seen on ultrasound and MRI.</li> </ul>                                                                                                                                                                          | <ul style="list-style-type: none"> <li>Excision</li> <li>Bilateral tumor excisions</li> </ul>                                                                                                                         |                         | <ul style="list-style-type: none"> <li>No recurrence after bilateral mastectomies.</li> </ul> |

|                     |    |                                                                                                                                                                             |                                                                                                                                                                                                                                                                                        |                                                                                                                                                                                                                                                                                                                                                                                                        |  |                                                                                                                                 |
|---------------------|----|-----------------------------------------------------------------------------------------------------------------------------------------------------------------------------|----------------------------------------------------------------------------------------------------------------------------------------------------------------------------------------------------------------------------------------------------------------------------------------|--------------------------------------------------------------------------------------------------------------------------------------------------------------------------------------------------------------------------------------------------------------------------------------------------------------------------------------------------------------------------------------------------------|--|---------------------------------------------------------------------------------------------------------------------------------|
|                     |    |                                                                                                                                                                             | <ul style="list-style-type: none"> <li>• Palpable masses in both breasts in 1 year.</li> <li>• Bilateral breast masses 2 years later resulting in macromastia.</li> </ul>                                                                                                              | <ul style="list-style-type: none"> <li>• Bilateral mastectomies with immediate breast reconstruction with expanders.</li> </ul>                                                                                                                                                                                                                                                                        |  |                                                                                                                                 |
| Lee et al., 2016    | 41 | <ul style="list-style-type: none"> <li>• Painful and swollen breasts for 2 months.</li> </ul>                                                                               | <ul style="list-style-type: none"> <li>• Excessively enlarged breasts without discrete masses.</li> <li>• Increased breast volumes to the preoperative size within 6 months.</li> </ul>                                                                                                | <ul style="list-style-type: none"> <li>• Bilateral reduction mammoplasty</li> <li>• Refused additional surgical treatment</li> </ul>                                                                                                                                                                                                                                                                   |  | <ul style="list-style-type: none"> <li>• Lost to follow up</li> </ul>                                                           |
| Pruthi et al., 2001 | 39 | <ul style="list-style-type: none"> <li>• Progressive bilateral breast enlargement with tenderness and erythema.</li> <li>• No history of oral contraceptive use.</li> </ul> | <ul style="list-style-type: none"> <li>• Bilateral asymmetrical enlargement with a palpable mass in the right axilla and left breast.</li> <li>• Recurrence of bilateral breast pain and engorgement as well as palpable masses in both breasts after drug discontinuation.</li> </ul> | <ul style="list-style-type: none"> <li>• A trial of tamoxifen for 1 year with improvement of erythema, pain, and breast size.</li> <li>• Reduced-dose tamoxifen for 6 months due to side-effects of the drug, then changing to raloxifene for 1 year with disappearance of the mass in the right breast.</li> <li>• Changing to tamoxifen, after development of side-effects of raloxifene.</li> </ul> |  | <ul style="list-style-type: none"> <li>• Decreased breast pain and engorgement with continuation of daily Tamoxifen.</li> </ul> |
| Roy et al., 2015    | 40 | <ul style="list-style-type: none"> <li>• Bilateral cyclical</li> </ul>                                                                                                      | <ul style="list-style-type: none"> <li>• Bilateral breast enlargement</li> </ul>                                                                                                                                                                                                       | <ul style="list-style-type: none"> <li>• Tamoxifen 10 mg for 4 months.</li> </ul>                                                                                                                                                                                                                                                                                                                      |  | <ul style="list-style-type: none"> <li>• Unremarkable</li> </ul>                                                                |

|                     |    |                                                                                                                                                            |                                                                                                                                                                                                                   |                                                                                                                                                                                                   |      |                                                                                                 |
|---------------------|----|------------------------------------------------------------------------------------------------------------------------------------------------------------|-------------------------------------------------------------------------------------------------------------------------------------------------------------------------------------------------------------------|---------------------------------------------------------------------------------------------------------------------------------------------------------------------------------------------------|------|-------------------------------------------------------------------------------------------------|
|                     |    | breast swelling                                                                                                                                            | and presence of mobile nodules.<br><ul style="list-style-type: none"> <li>• Continuous enlargement of breasts despite medical management .</li> </ul>                                                             | <ul style="list-style-type: none"> <li>• Bilateral breast reduction with free nipple graft (pathological results: PASH and giant fibroadenoma).</li> </ul>                                        |      | postoperative course.                                                                           |
| Bourke et al., 2015 | 46 | <ul style="list-style-type: none"> <li>• Bilateral asymmetrical breast enlargement for 6 weeks</li> <li>• Using contraceptive coil for 6 months</li> </ul> | <ul style="list-style-type: none"> <li>• Markedly edematous breasts without discrete masses</li> <li>• Enlargement of the breasts 3 years later</li> </ul>                                                        | <ul style="list-style-type: none"> <li>• Bilateral mammoplasty with image-guided localization of the suspected lesions</li> <li>• Bilateral mastectomies with immediate reconstruction</li> </ul> |      | <ul style="list-style-type: none"> <li>• No recurrence after bilateral mastectomies.</li> </ul> |
| Samaila et al.,2018 | 34 | <ul style="list-style-type: none"> <li>• Progressive painless bilateral enlargement of breasts</li> <li>• No hormonal profile</li> </ul>                   | <ul style="list-style-type: none"> <li>• Bilateral breast enlargement for 1 year</li> <li>• Accelerated enlargement a few weeks after surgery.</li> <li>• No palpable mass</li> </ul>                             | <ul style="list-style-type: none"> <li>• Excision of masses in both breasts</li> <li>• No pathological result</li> <li>• Bilateral mastectomies</li> </ul>                                        |      | <ul style="list-style-type: none"> <li>• No recurrence during a 6-month follow-up.</li> </ul>   |
| Rabe et al., 2024   | 27 | <ul style="list-style-type: none"> <li>• Bilateral breast enlargement during gestation.</li> <li>• Elevation of reproductive hormones.</li> </ul>          | <ul style="list-style-type: none"> <li>• Bilateral enlargement during pregnancy.</li> <li>• Multiple masses in both breasts.</li> <li>• Breasts reduced in size after a caesarean section at 34 weeks.</li> </ul> | <ul style="list-style-type: none"> <li>• Cabergoline 0.25mg twice weekly</li> <li>• Bilateral mastectomy with a Goldilocks reconstruction and free nipple grafts.</li> </ul>                      | none | <ul style="list-style-type: none"> <li>• No recurrence after bilateral mastectomies.</li> </ul> |
| Wang et al., 2023   | 43 | <ul style="list-style-type: none"> <li>• Progressive and rapid bilateral breast enlargement coinciding with onset of</li> </ul>                            | <ul style="list-style-type: none"> <li>• Recurrently symptomatic PASH lump with initiation of infertility treatment.</li> <li>• Left breast larger than right.</li> </ul>                                         | <ul style="list-style-type: none"> <li>• Tamoxifen for 3 months.</li> <li>• Bilateral extensive lump excisions with oncoplastic closure.</li> </ul>                                               | none | <ul style="list-style-type: none"> <li>• No recurrence after bilateral mastectomies.</li> </ul> |

|                                |    |                                                                                                                                               |                                                                                                                                                                                                                                                |                                                                                                                                                                                                                                     |                                                                                         |                                                                                                        |
|--------------------------------|----|-----------------------------------------------------------------------------------------------------------------------------------------------|------------------------------------------------------------------------------------------------------------------------------------------------------------------------------------------------------------------------------------------------|-------------------------------------------------------------------------------------------------------------------------------------------------------------------------------------------------------------------------------------|-----------------------------------------------------------------------------------------|--------------------------------------------------------------------------------------------------------|
|                                |    | infertility treatment.                                                                                                                        | <ul style="list-style-type: none"> <li>• Rapid breast enlargement after conceiving via IVF.</li> <li>• At 20 weeks gestation, patient developed taut darkening skin, moderate erythema, and edema throughout her bilateral breasts.</li> </ul> | <ul style="list-style-type: none"> <li>• Left reduction mammoplasty.</li> <li>• Bilateral mastectomy.</li> </ul>                                                                                                                    |                                                                                         |                                                                                                        |
| Woo et al., 2023               | 14 | <ul style="list-style-type: none"> <li>• Bilateral breast enlargement over one year.</li> <li>• No hormonal imbalance.</li> </ul>             | <ul style="list-style-type: none"> <li>• Rapid growth for 6 months leading up to treatment.</li> </ul>                                                                                                                                         | <ul style="list-style-type: none"> <li>• Bilateral breast reconstruction</li> </ul>                                                                                                                                                 | none                                                                                    | <ul style="list-style-type: none"> <li>• No regrowth after bilateral reduction.</li> </ul>             |
| Sornlertlumvanich et al., 2023 | 13 | <ul style="list-style-type: none"> <li>• Third recurrence of bilateral gigantomastia caused by incomplete removal of tumoral PASH.</li> </ul> | <ul style="list-style-type: none"> <li>• Abnormal and asymmetric breast enlargement starting at age 9.</li> <li>• Recurring and rapid growth.</li> <li>• Current presentation occurred 6 months after subcutaneous mastectomy.</li> </ul>      | <ul style="list-style-type: none"> <li>• Gonadotropin-releasing hormone (GnRH) analog.</li> <li>• Bilateral reduction mammoplasty.</li> <li>• Bilateral subcutaneous mastectomy</li> <li>• Bilateral simple mastectomies</li> </ul> | none                                                                                    | <ul style="list-style-type: none"> <li>• No recurrence after bilateral simple mastectomies.</li> </ul> |
| Parisi et al., 2023            | 27 | <ul style="list-style-type: none"> <li>• Extremely severe and progressive bilateral breast enlargement.</li> </ul>                            | <ul style="list-style-type: none"> <li>• Massive and continuous growth since the age of 18 despite reduction at age 20.</li> </ul>                                                                                                             | <ul style="list-style-type: none"> <li>• Bilateral reduction mammoplasty</li> <li>• Bilateral mastectomy with free NAC grafting and delayed breast reconstruction.</li> </ul>                                                       | <ul style="list-style-type: none"> <li>• Free NAC graft necrosis bilaterally</li> </ul> | <ul style="list-style-type: none"> <li>• No recurrence at the time of publication.</li> </ul>          |
| Vashistha et al., 2020         | 37 | <ul style="list-style-type: none"> <li>• Painless progressive and</li> </ul>                                                                  | <ul style="list-style-type: none"> <li>• Progressive enlargement for 8 years.</li> </ul>                                                                                                                                                       | <ul style="list-style-type: none"> <li>• Bilateral reduction</li> </ul>                                                                                                                                                             | none                                                                                    | <ul style="list-style-type: none"> <li>• No comment on</li> </ul>                                      |

|                        |    |                                                                                                                                                                   |                                                                                                                                                                                                        |                                                                                                                                                                  |      |                                                                                                  |
|------------------------|----|-------------------------------------------------------------------------------------------------------------------------------------------------------------------|--------------------------------------------------------------------------------------------------------------------------------------------------------------------------------------------------------|------------------------------------------------------------------------------------------------------------------------------------------------------------------|------|--------------------------------------------------------------------------------------------------|
|                        |    | massive breast enlargement of breasts with associated severe back pain                                                                                            |                                                                                                                                                                                                        | mammoplasty                                                                                                                                                      |      | recurrence.                                                                                      |
| Vyas et al., 2020      | 20 | <ul style="list-style-type: none"> <li>Progressive bilateral breast swelling, engorgement, cellulitis and ulceration</li> </ul>                                   | <ul style="list-style-type: none"> <li>Five months of progressive breast enlargement.</li> <li>Symptoms began post-partum and was exacerbated after implantation of a birth control device.</li> </ul> | <ul style="list-style-type: none"> <li>Removed birth control device.</li> <li>Topical and oral antifungal medications.</li> <li>Tamoxifen 20mg daily.</li> </ul> | none | <ul style="list-style-type: none"> <li>No comment on outcome.</li> </ul>                         |
| Al-Balas et al., 2020  | 21 | <ul style="list-style-type: none"> <li>Bilateral breast enlargement and neck pain</li> </ul>                                                                      | <ul style="list-style-type: none"> <li>Progressive growth over two-years</li> </ul>                                                                                                                    | <ul style="list-style-type: none"> <li>Bilateral reductive mammoplasty</li> </ul>                                                                                | none | <ul style="list-style-type: none"> <li>No recurrence at 9 months.</li> </ul>                     |
| Krawczyk et al., 2016  | 33 | <ul style="list-style-type: none"> <li>Massive bilateral breast enlargement within the first trimester of gestation with dichorionic diamniotic twins.</li> </ul> | <ul style="list-style-type: none"> <li>Rapid breast growth for 16 weeks associated with breast tenderness, back pain with movement limitation and respiratory impairment.</li> </ul>                   | <ul style="list-style-type: none"> <li>Bilateral skin-sparing mastectomy with immediate reconstruction</li> </ul>                                                | none | <ul style="list-style-type: none"> <li>Uneventful delivery, no comment on recurrence.</li> </ul> |
| Alikhassi et al., 2016 | 45 | <ul style="list-style-type: none"> <li>Asymmetric bilateral breast enlargement</li> </ul>                                                                         | <ul style="list-style-type: none"> <li>Slow growth over two years.</li> </ul>                                                                                                                          | <ul style="list-style-type: none"> <li>Observation</li> </ul>                                                                                                    | none | <ul style="list-style-type: none"> <li>n/a</li> </ul>                                            |
